# Supplementary figures and images for: An alternative splicing switch shapes neurexin repertoires in principal neurons versus interneurons in the mouse hippocampus
Source: eLife journal article supplement (doi:10.7554/elife.22757), 2016-12-13

Figure 2-figure supplement 2

**A**

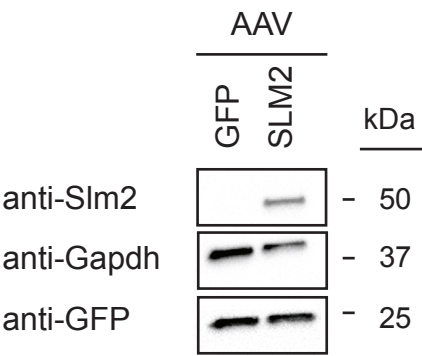

**B**

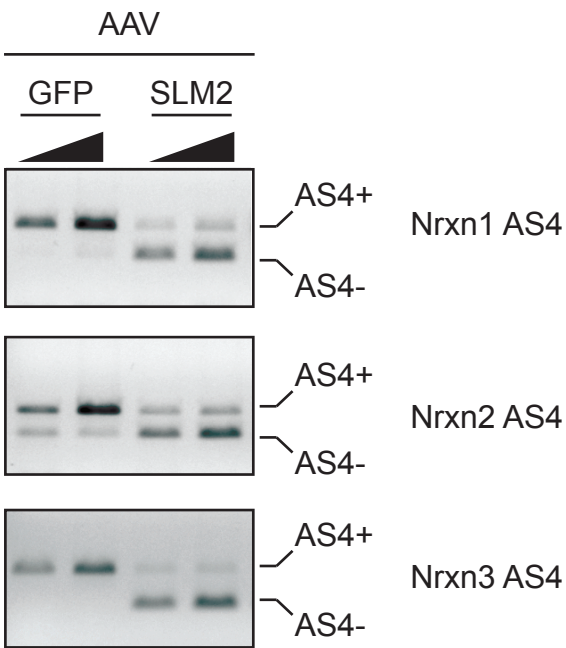

Supplement: supp [file elife-22757-supp-v1.zip]

Figure 1-figure supplement 2

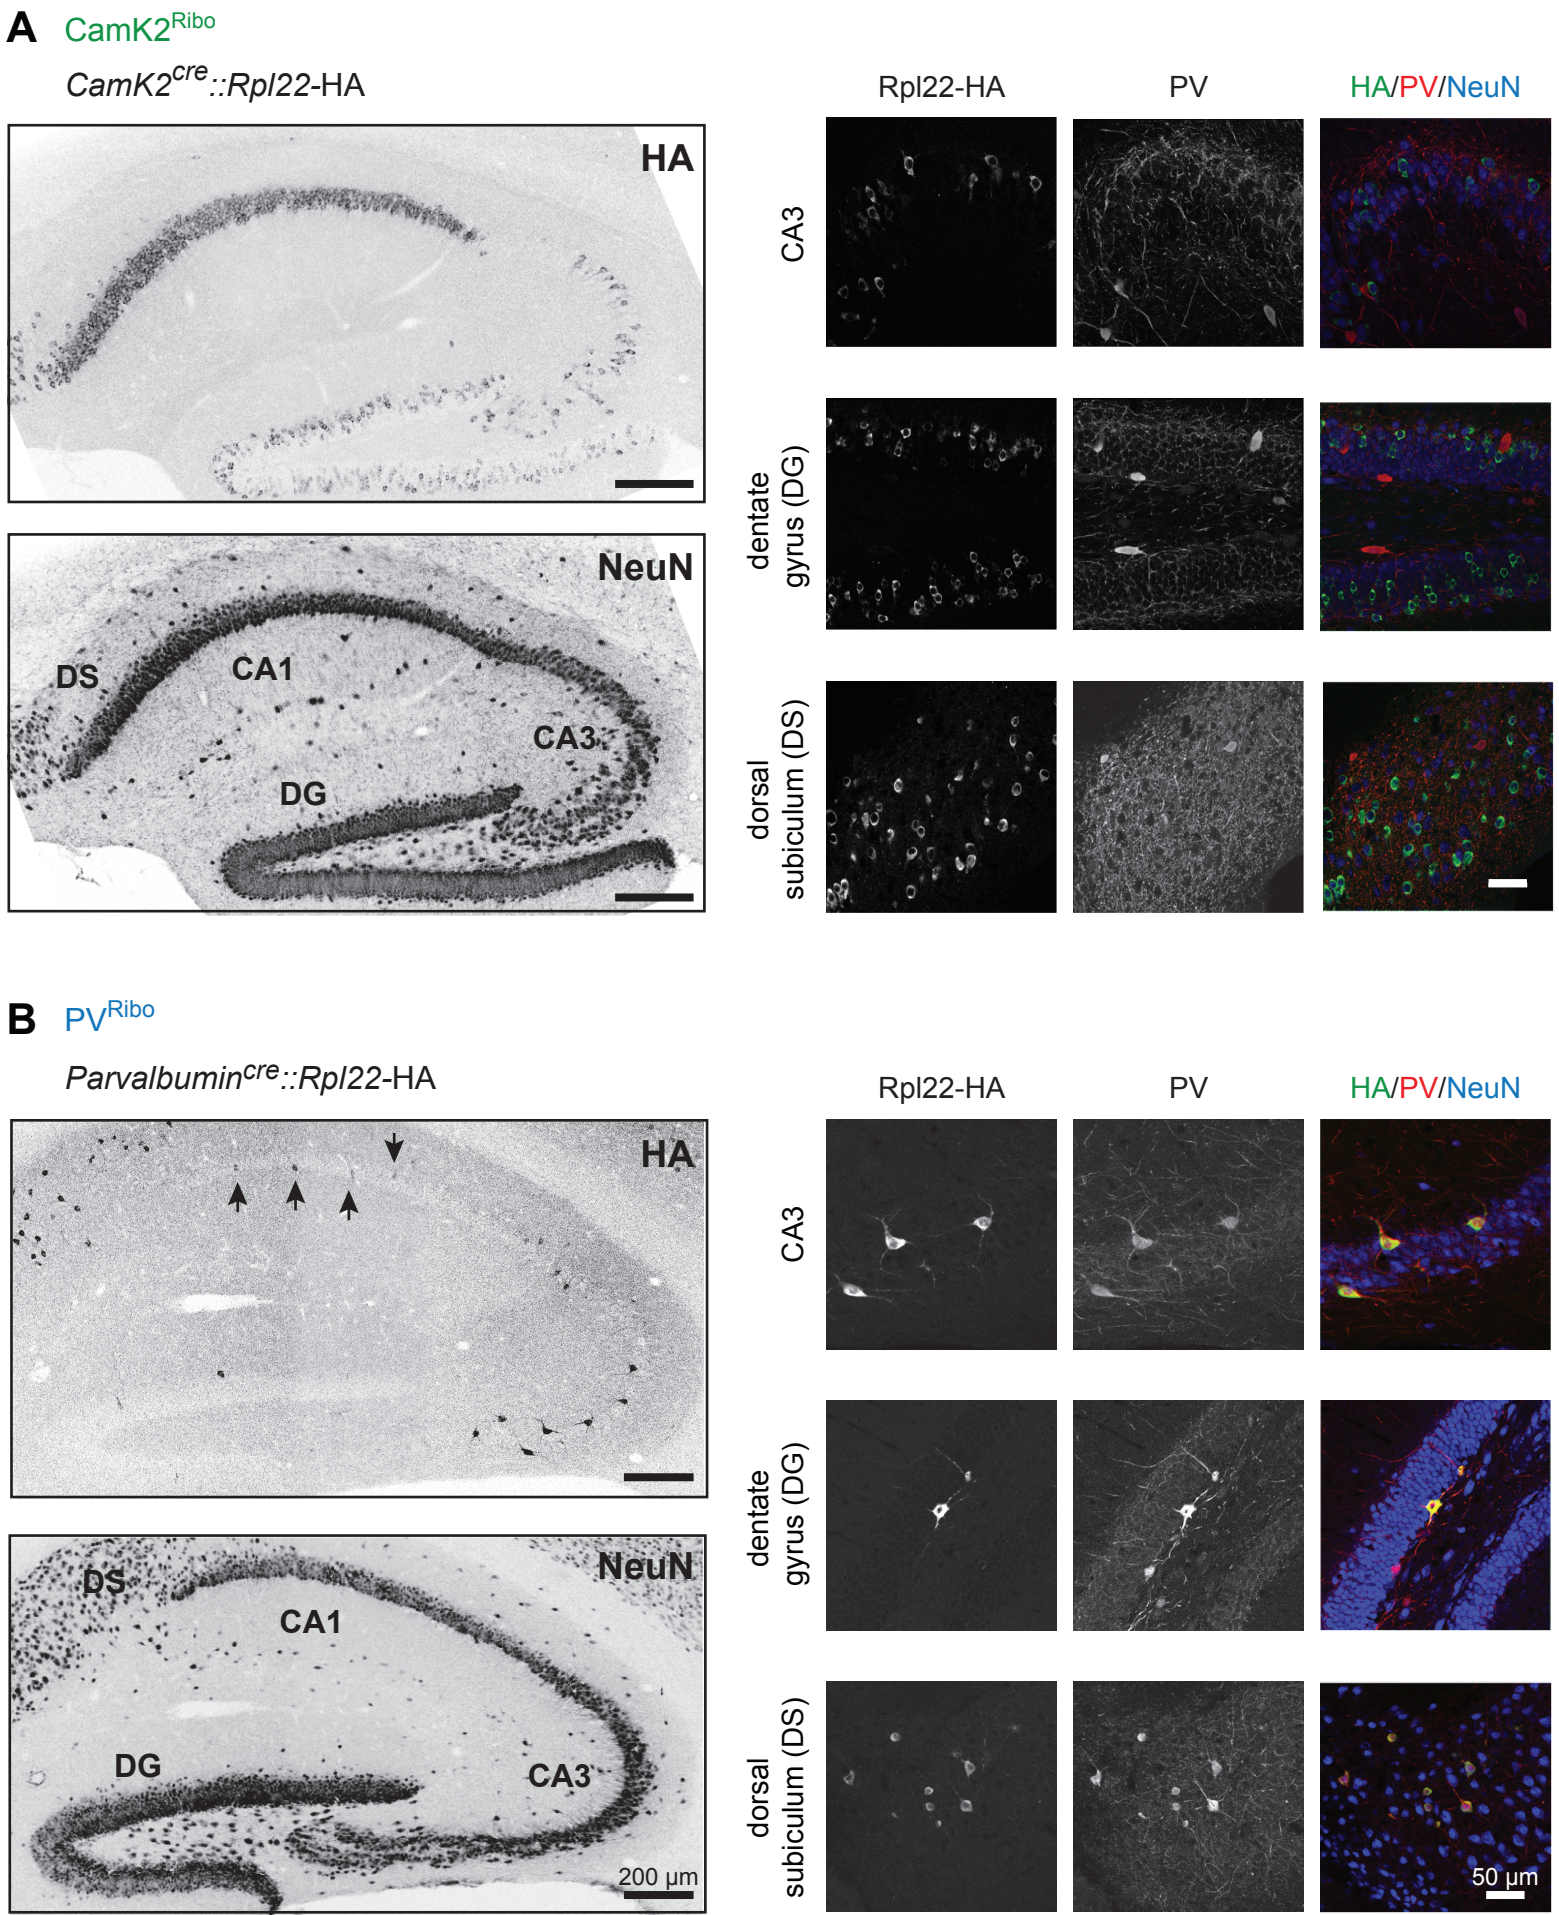

Supplement: supp [file elife-22757-supp-v1.zip]

Figure 2-figure supplement 1

A Hippocampus

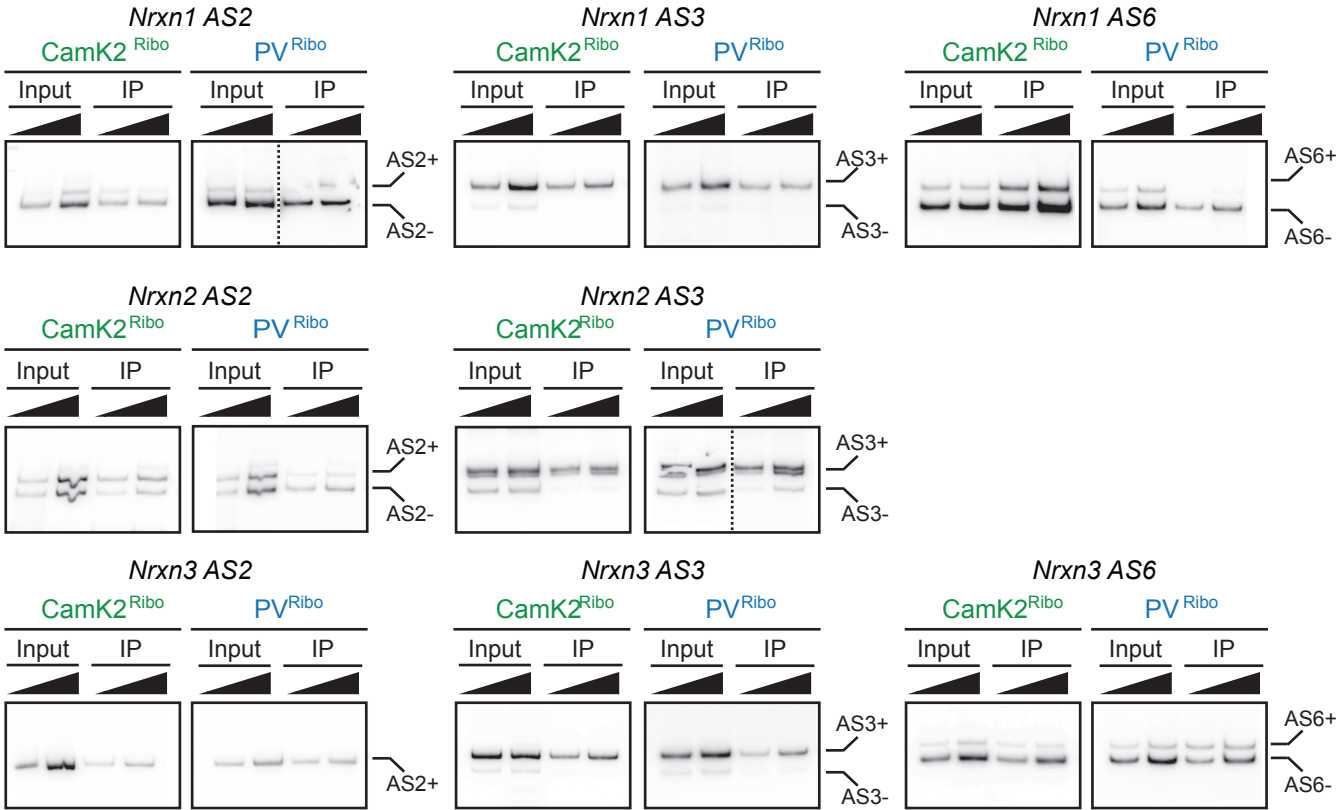

B

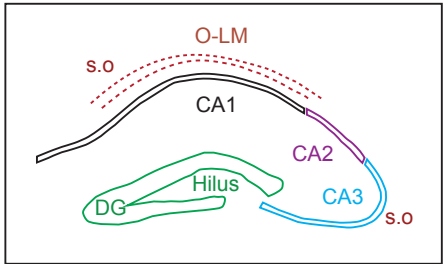

C

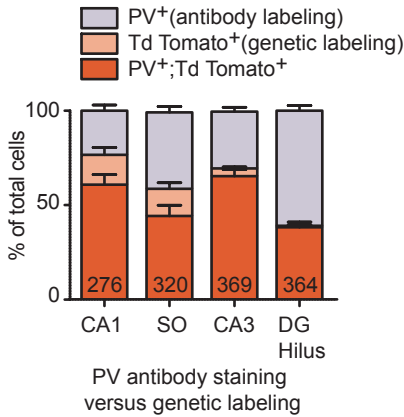

D

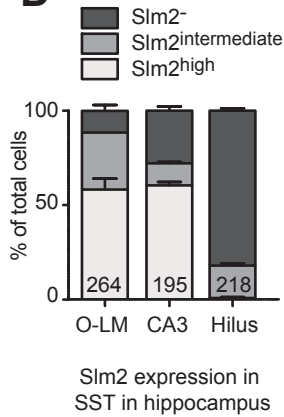

E

Cortex

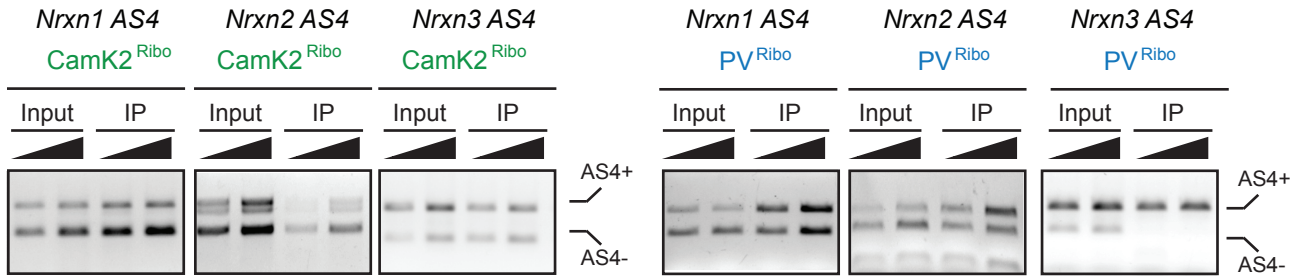

F

Hippocampus

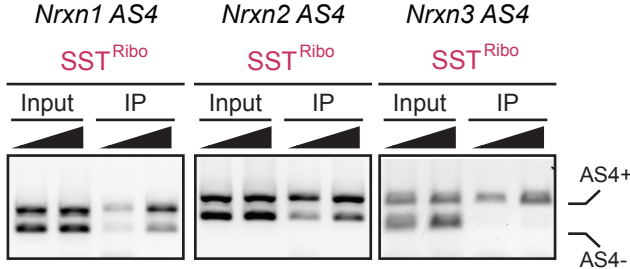

Supplement: supp [file elife-22757-supp-v1.zip]

**Figure 1-figure supplement 1**

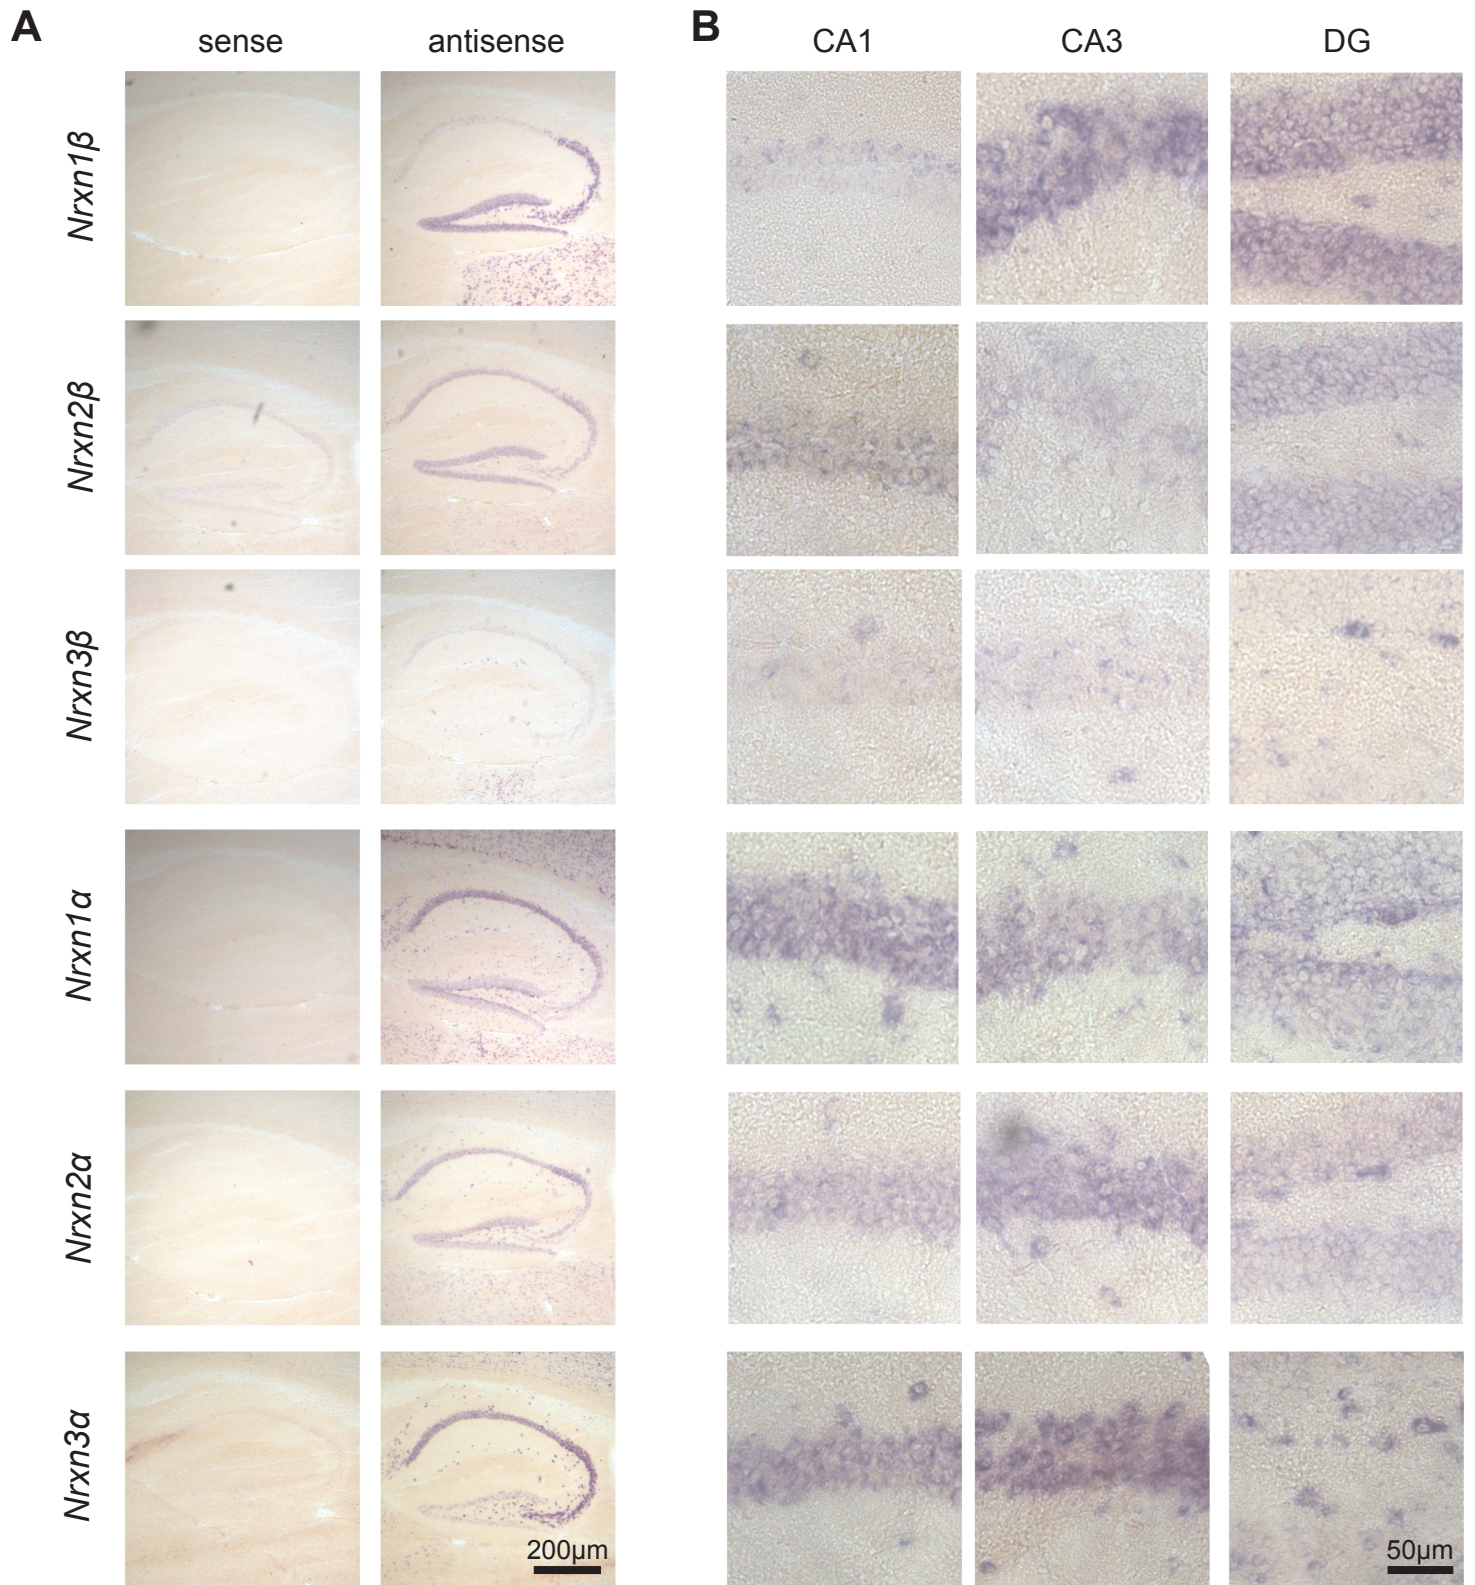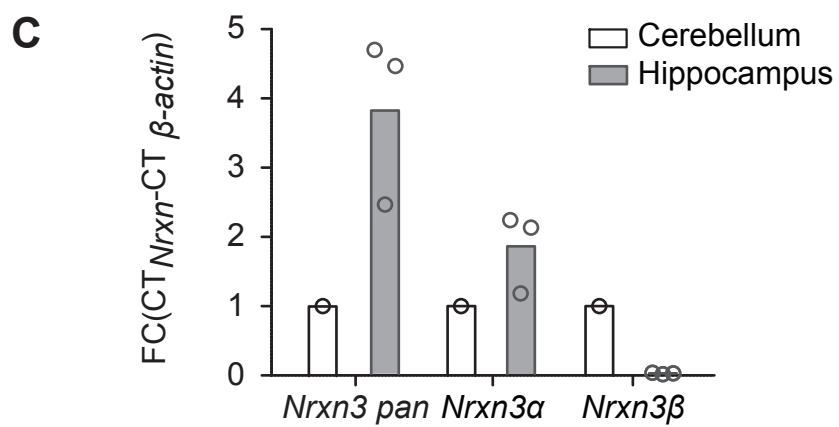

Supplement: supp [file elife-22757-supp-v1.zip]

Figure 5-figure supplement 2

A

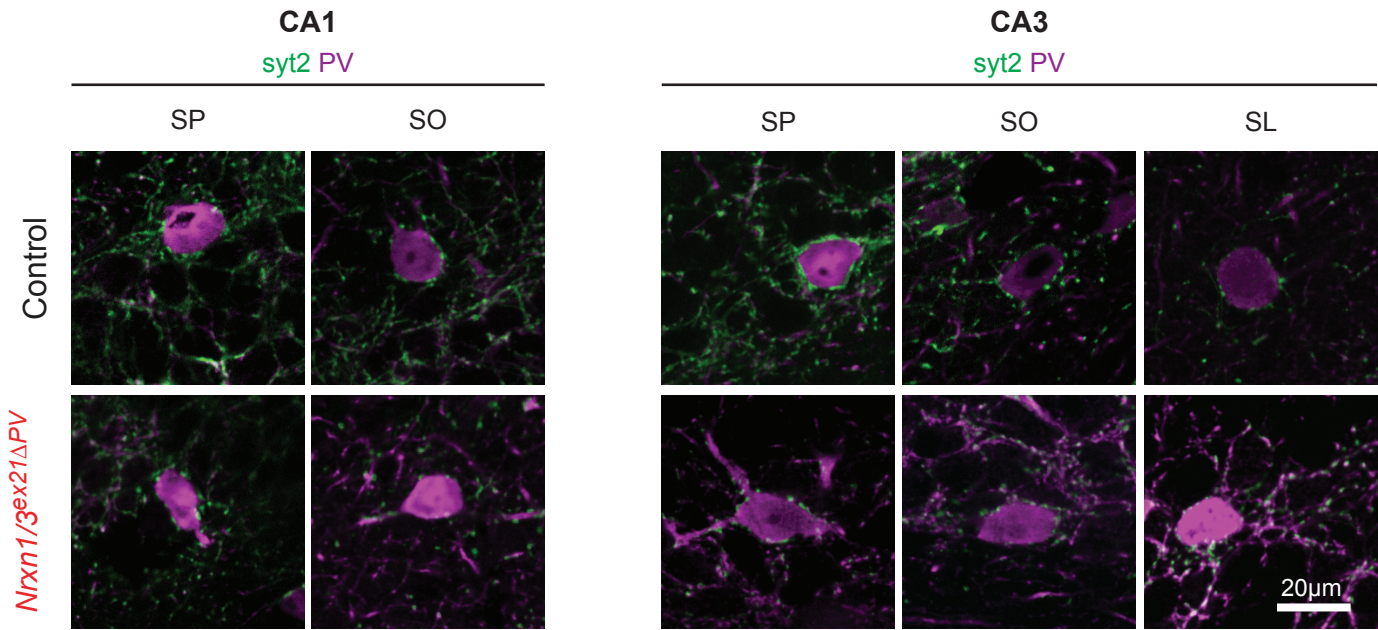

B

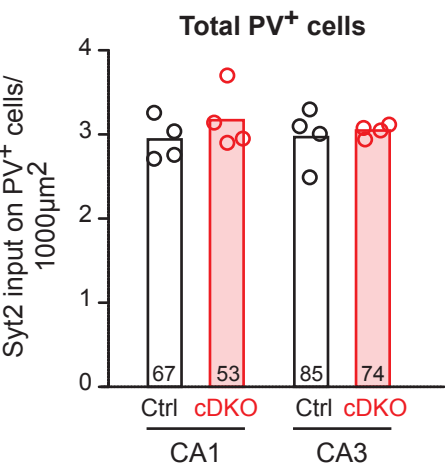

C

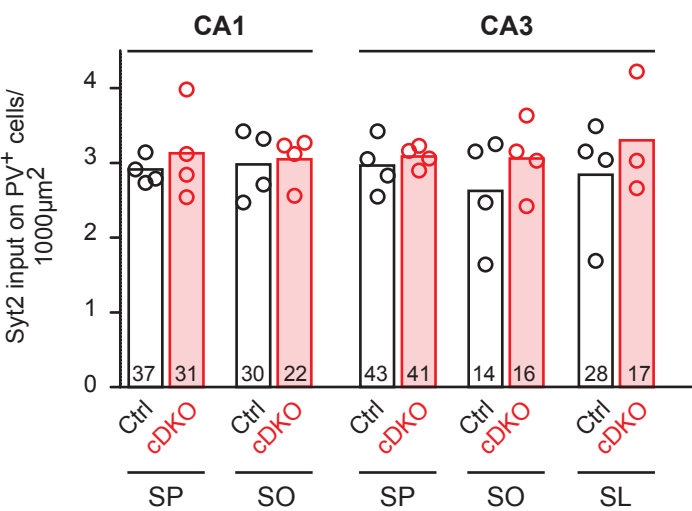

Supplement: supp [file elife-22757-supp-v1.zip]

Figure 4-figure supplement 1

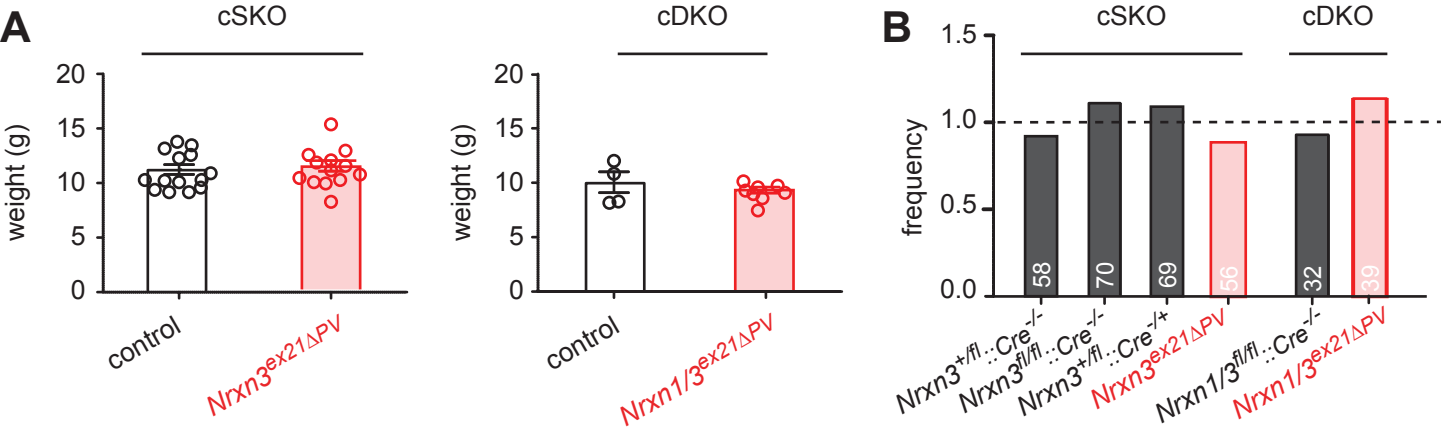

Supplement: supp [file elife-22757-supp-v1.zip]

Figure 3-figure supplement 1

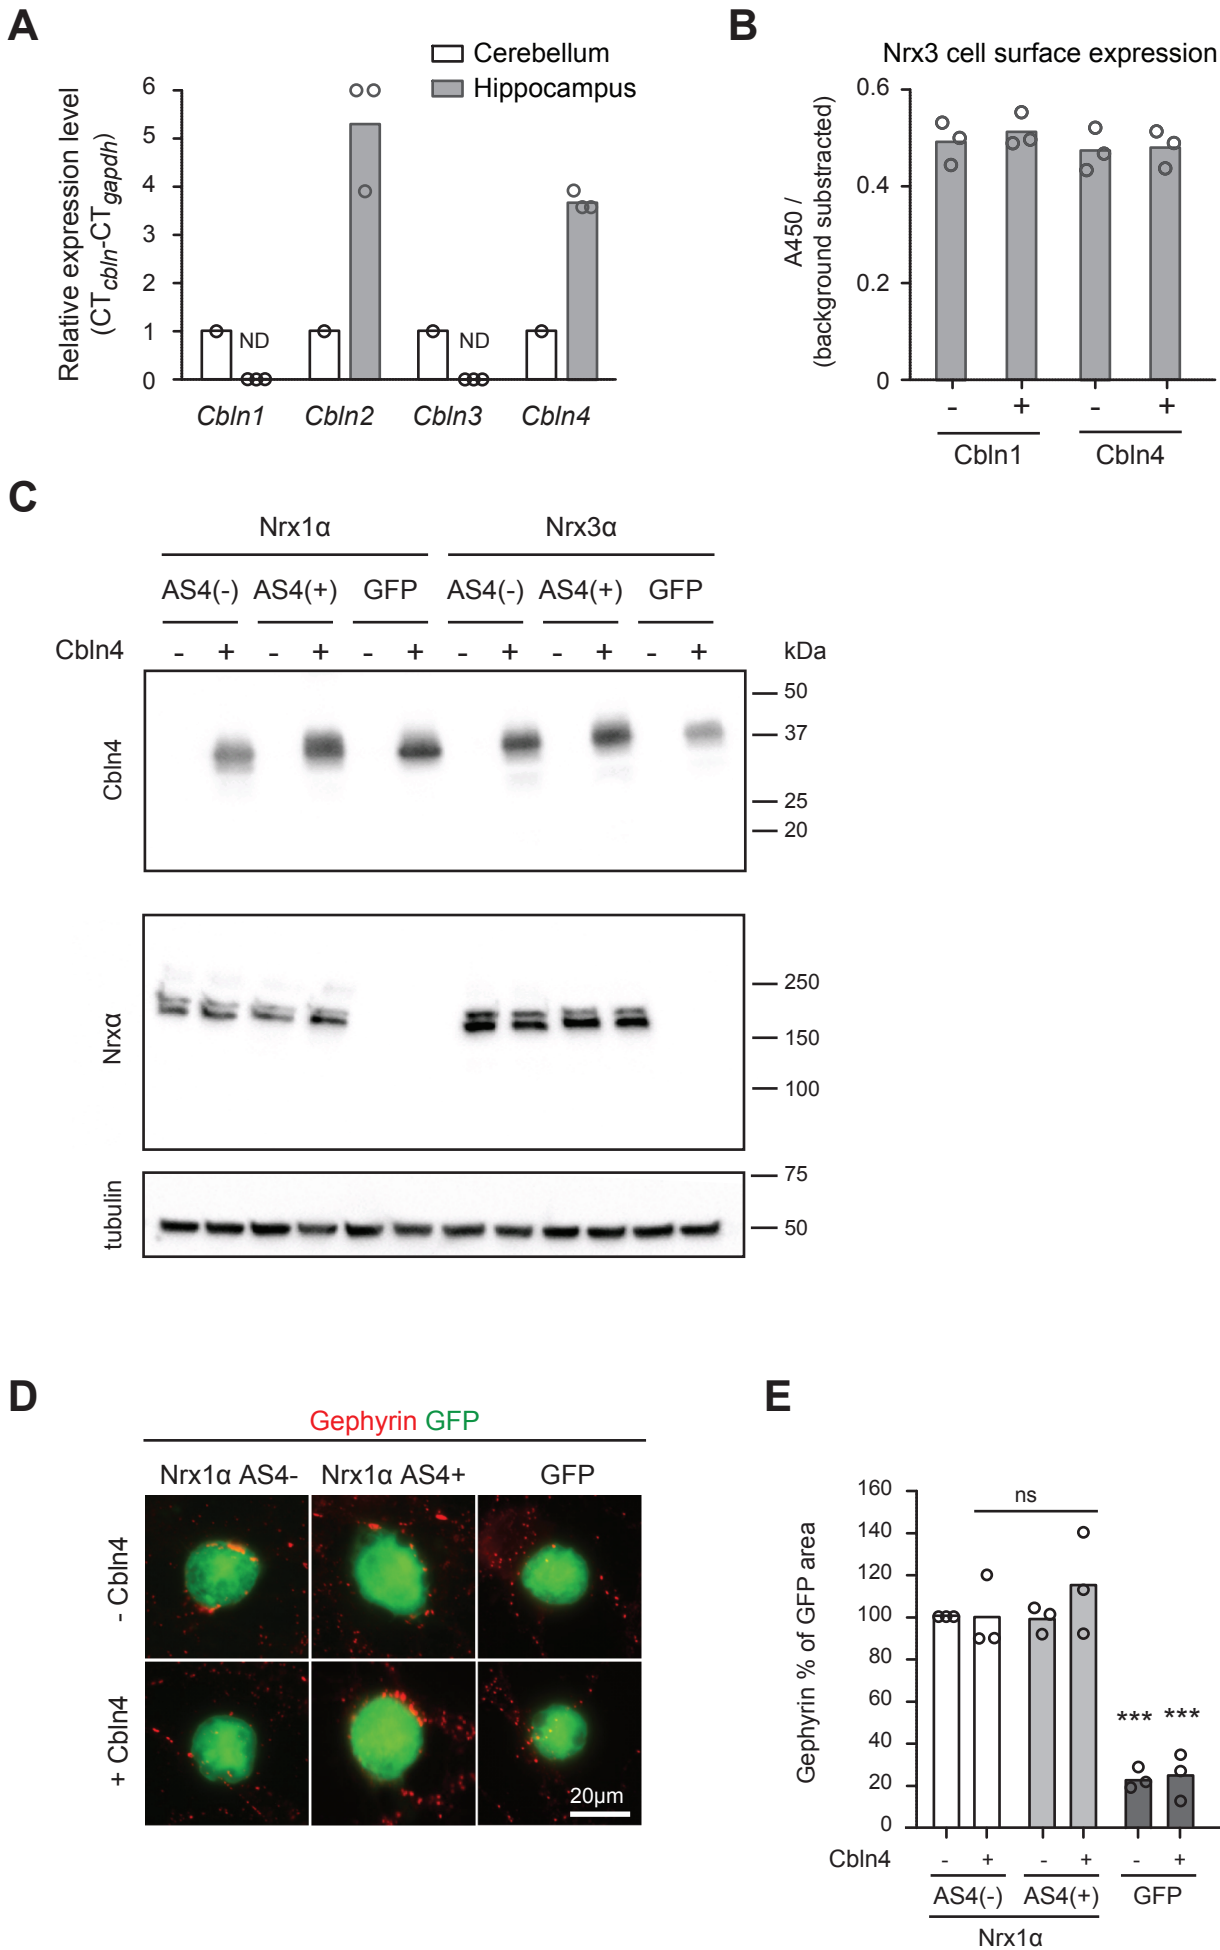

Supplement: supp [file elife-22757-supp-v1.zip]

# Figure 5-figure supplement 1

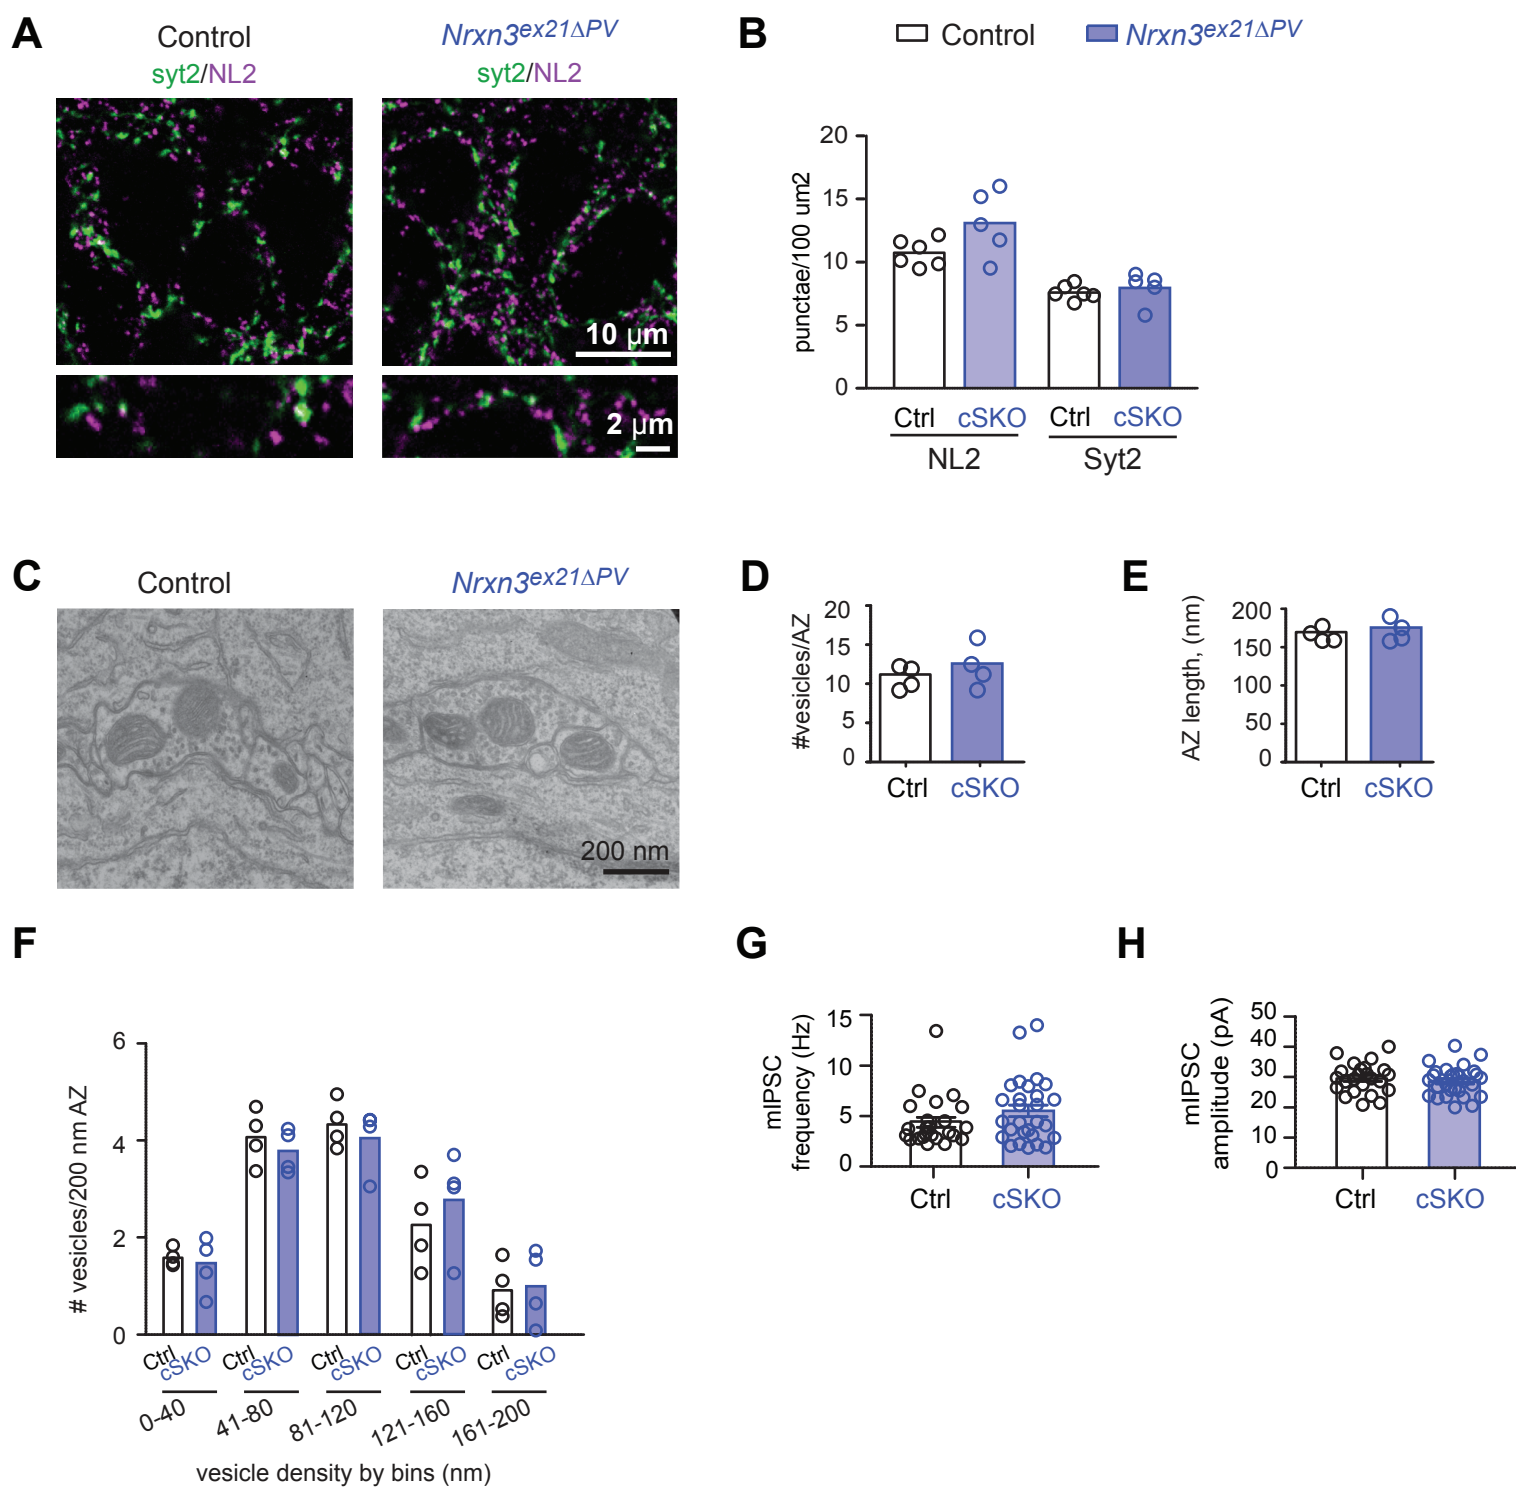

Supplement: supp [file elife-22757-supp-v1.zip]
